# Supplementary material for: Risk Assessment for Children Exposed to Beach Sands Impacted by Oil Spill Chemicals
Source: PubMed Central journal article supplement (PMC5036686; doi:10.3390/ijerph13090853), 2016-08-27

# Supplementary Materials: Risk Assessment for Children Exposed to Beach Sands Impacted by Oil Spill Chemicals

Jennifer C. Black, Jennifer N. Welday, Brian Buckley, Alesia Ferguson, Patrick L. Gurian, Kristina D. Mena, III Yang, Elizabeth McCandlish and Helena M. Solo-Gabriele

**Table S1.** Non-target tentatively identified compounds in beach sands and tar collected from Grand Isle beaches. Order of chemicals in terms of highest levels to lowest.

| CAS Number  | Chemical Name                                                        | Grand Isle State Park |               |       |                        |                        | Grand Isle Beach |             |                         |                   |
|-------------|----------------------------------------------------------------------|-----------------------|---------------|-------|------------------------|------------------------|------------------|-------------|-------------------------|-------------------|
|             |                                                                      | Inter-Tidal_1         | Inter-Tidal_2 | Dune  | Inter-Tidal_1 Targeted | Inter-Tidal_2 Targeted | Bottom of Dune   | Top of Dune | Bottom of Dune Targeted | Mix of 3 Tarballs |
| 108-88-3    | Toluene                                                              | 16.726                | 3.806         | 1.090 | 0.069                  | 1.927                  | 0.110            | 0.962       | 0.072                   | 9.307             |
| None        | Oxime-, methoxy-phenyl-                                              | 0.000                 | 0.027         | 2.059 | 0.000                  | 3.255                  | 1.001            | 0.671       | 4.250                   | 3.412             |
| 584-84-9    | Benzene, 2,4-diisocyanato-1-methyl-                                  | 1.277                 | 0.952         | 0.745 | 0.013                  | 0.727                  | 0.582            | 0.469       | 0.472                   | 2.141             |
| None        | 1-Methyl-1-(o-methylphenyl)-1-silacyclobutane                        | 0.056                 | 0.029         | 0.000 | 0.026                  | 0.073                  | 0.015            | 0.017       | 0.003                   | 6.516             |
| 629-62-9    | Pentadecane                                                          | 0.040                 | 0.059         | 0.000 | 0.039                  | 4.965                  | 0.048            | 0.033       | 0.024                   | 0.094             |
| 1190-34-7   | 5-Hepten-3-one, 5-methyl-                                            | 0.443                 | 0.302         | 1.407 | 0.149                  | 0.170                  | 0.312            | 0.198       | 0.359                   | 1.805             |
| 496-11-7    | Indane                                                               | 0.000                 | 0.012         | 0.000 | 0.000                  | 0.000                  | 0.000            | 0.000       | 0.000                   | 4.839             |
| 5400-75-9   | 2H-Benzimidazol-2-one, 1,3-dihydro-5-methyl-                         | 0.482                 | 0.440         | 0.354 | 0.380                  | 0.475                  | 0.366            | 0.329       | 0.336                   | 1.477             |
| 2461-15-6   | Oxirane, [[(2-ethylhexyl)oxy]methyl]-                                | 0.169                 | 0.251         | 0.327 | 0.297                  | 0.023                  | 0.110            | 0.180       | 0.008                   | 2.919             |
| None        | 4b,8-Dimethyl-2-isopropylphenanthrene, 4b,5,6,7,8,8a,9,10-octahydro- | 0.000                 | 0.000         | 0.000 | 0.000                  | 0.000                  | 0.000            | 0.000       | 0.000                   | 3.953             |
| 110-54-3    | n-Hexane                                                             | 0.552                 | 0.215         | 0.040 | 0.019                  | 0.022                  | 0.008            | 0.008       | 0.000                   | 2.305             |
| 192823-15-7 | Decane, 2,3,5,8-tetramethyl-                                         | 0.159                 | 0.182         | 0.477 | 0.351                  | 0.103                  | 0.052            | 0.056       | 0.000                   | 1.464             |
| 544-76-3    | Hexadecane                                                           | 0.159                 | 0.182         | 0.962 | 0.351                  | 0.000                  | 0.052            | 0.099       | 0.000                   | 0.950             |
| 106-42-3    | p-Xylene                                                             | 0.049                 | 0.029         | 0.046 | 0.000                  | 0.472                  | 0.000            | 0.042       | 0.000                   | 2.068             |
| 719-22-2    | 2,5-Cyclohexadiene-1,4-dione, 2,6-bis(1,1-dimethylethyl)-            | 0.680                 | 0.435         | 0.106 | 0.013                  | 0.020                  | 0.840            | 0.295       | 0.026                   | 0.094             |
| 3934-87-0   | 3,4-Dihydroxy-5-methoxybenzaldehyde                                  | 0.153                 | 1.286         | 0.165 | 0.000                  | 0.019                  | 0.342            | 0.518       | 0.016                   | 0.000             |
| 100-41-4    | Ethylbenzene                                                         | 0.022                 | 0.000         | 0.000 | 0.000                  | 0.114                  | 0.000            | 0.000       | 0.000                   | 1.984             |
| 488-23-3    | Benzene, 1,2,3,4-tetramethyl-                                        | 0.000                 | 0.095         | 0.939 | 0.351                  | 0.000                  | 0.052            | 0.099       | 0.000                   | 0.453             |
| 55320-57-5  | Hexanal, 3,3-dimethyl-                                               | 0.086                 | 0.080         | 0.628 | 0.222                  | 0.015                  | 0.027            | 0.086       | 0.000                   | 0.815             |
| 112-50-5    | Ethanol, 2-[2-(2-ethoxyethoxy)ethoxy]-                               | 0.040                 | 0.007         | 0.000 | 0.000                  | 0.015                  | 0.000            | 0.005       | 0.000                   | 1.846             |
| 597-49-9    | 3-Pentanol, 3-ethyl-                                                 | 1.362                 | 0.260         | 0.144 | 0.000                  | 0.000                  | 0.000            | 0.115       | 0.000                   | 0.000             |
| 2371-19-9   | 2-Heptanone, 3-methyl-                                               | 0.032                 | 0.029         | 0.046 | 0.000                  | 0.472                  | 0.000            | 0.042       | 0.000                   | 1.175             |
| 96-76-4     | Phenol, 2,4-bis(1,1-dimethylethyl)-                                  | 0.019                 | 0.105         | 0.000 | 0.042                  | 1.275                  | 0.056            | 0.009       | 0.096                   | 0.105             |
| 108-67-8    | Mesitylene                                                           | 0.008                 | 0.020         | 0.965 | 0.000                  | 0.092                  | 0.033            | 0.010       | 0.000                   | 0.554             |
| None        | 2,6-Difluoro-3-methylbenzamide, N-(1-naphthyl)-                      | 0.098                 | 0.103         | 0.125 | 0.146                  | 0.152                  | 0.103            | 0.093       | 0.099                   | 0.686             |

Table S1. Cont.

| CAS Number  | Chemical Name                                                                         | Grand Isle State Park |               |       | Grand Isle Beach       |                        |                |             |                         |                   |
|-------------|---------------------------------------------------------------------------------------|-----------------------|---------------|-------|------------------------|------------------------|----------------|-------------|-------------------------|-------------------|
|             |                                                                                       | Inter-Tidal_1         | Inter-Tidal_2 | Dune  | Inter-Tidal_1 Targeted | Inter-Tidal_2 Targeted | Bottom of Dune | Top of Dune | Bottom of Dune Targeted | Mix of 3 Tarballs |
| 320784-52-9 | Propan-2-ol,<br>1-(2-isopropyl-5-methylcyclohexyloxy)-3-(4-morpholyl)-                | 0.026                 | 0.050         | 0.077 | 0.125                  | 0.187                  | 0.077          | 0.090       | 0.150                   | 0.584             |
| 108-38-3    | Benzene, 1,3-dimethyl-                                                                | 0.031                 | 0.017         | 0.000 | 0.000                  | 0.159                  | 0.000          | 0.014       | 0.000                   | 1.016             |
| 108-38-3    | m-Xylene                                                                              | 0.029                 | 0.017         | 0.000 | 0.000                  | 0.159                  | 0.000          | 0.014       | 0.000                   | 1.014             |
| 15869-87-1  | Octane, 2,2-dimethyl-                                                                 | 0.099                 | 0.030         | 0.974 | 0.010                  | 0.000                  | 0.048          | 0.052       | 0.000                   | 0.000             |
| 552-96-5    | 2,4,6-Cycloheptatrien-1-one,<br>2-hydroxy-5-(3-methyl-2-butenyl)-4-(1-methylethenyl)- | 0.212                 | 0.090         | 0.134 | 0.000                  | 0.000                  | 0.387          | 0.279       | 0.003                   | 0.000             |
| None        | 5-Methyl-2-(2-methyl-2-tetrahydrofuryl)tetrahydrofuran                                | 0.017                 | 0.039         | 0.780 | 0.008                  | 0.009                  | 0.010          | 0.010       | 0.000                   | 0.207             |
| None        | 17.alpha.,21.beta.-28,30-Bisnorhopane                                                 | 0.000                 | 0.003         | 0.000 | 0.030                  | 0.013                  | 0.000          | 0.000       | 0.000                   | 1.032             |
| 74630-16-3  | Phosphonous dichloride,<br>(1,7,7-trimethylbicyclo[2.2.1]hept-2-yl)-                  | 0.254                 | 0.101         | 0.213 | 0.000                  | 0.000                  | 0.249          | 0.262       | 0.000                   | 0.000             |
| 150544-04-0 | Indole-2-one, 2,3-dihydro-6-amino-                                                    | 0.126                 | 0.126         | 0.098 | 0.110                  | 0.053                  | 0.089          | 0.079       | 0.031                   | 0.304             |
| None        | 3-Methylpyrazolo[bis(9-borabicyclo[3.3.1]nona-9-yl)thio]oxide                         | 0.000                 | 0.000         | 0.000 | 0.000                  | 0.000                  | 0.000          | 0.000       | 0.000                   | 0.908             |
| 55517-88-9  | Benzene, 1,4-dihexadecyl-                                                             | 0.039                 | 0.040         | 0.267 | 0.080                  | 0.030                  | 0.013          | 0.017       | 0.000                   | 0.422             |
| 56554-64-4  | Hexadecane, 1,1-bis(dodecyloxy)-                                                      | 0.000                 | 0.000         | 0.165 | 0.725                  | 0.000                  | 0.000          | 0.000       | 0.000                   | 0.000             |
| 41898-89-9  | 2,3-Heptadien-5-yne, 2,4-dimethyl-                                                    | 0.000                 | 0.006         | 0.294 | 0.000                  | 0.051                  | 0.000          | 0.000       | 0.000                   | 0.490             |
| 1120-21-4   | Undecane                                                                              | 0.099                 | 0.032         | 0.144 | 0.010                  | 0.000                  | 0.048          | 0.052       | 0.011                   | 0.391             |
| 18479-57-7  | 2-Octanol, 2,6-dimethyl-                                                              | 0.023                 | 0.033         | 0.045 | 0.000                  | 0.000                  | 0.034          | 0.601       | 0.032                   | 0.000             |
| 87020-51-7  | Octadecanoic acid, tert-butyl dimethylsilyl ester                                     | 0.074                 | 0.159         | 0.000 | 0.025                  | 0.000                  | 0.109          | 0.000       | 0.164                   | 0.222             |
| 14411-56-4  | Benzene, 1-(1,1-dimethylethyl)-3-ethyl-                                               | 0.085                 | 0.127         | 0.454 | 0.000                  | 0.000                  | 0.000          | 0.050       | 0.000                   | 0.000             |
| 16747-25-4  | Hexane, 2,2,3-trimethyl-                                                              | 0.016                 | 0.000         | 0.015 | 0.018                  | 0.008                  | 0.000          | 0.086       | 0.000                   | 0.570             |
| 74685-33-9  | 3-Eicosene, (E)-                                                                      | 0.000                 | 0.016         | 0.000 | 0.000                  | 0.621                  | 0.000          | 0.045       | 0.006                   | 0.000             |
| 98-88-4     | Benzoyl chloride                                                                      | 0.017                 | 0.000         | 0.267 | 0.000                  | 0.130                  | 0.000          | 0.000       | 0.000                   | 0.254             |
| 78706-77-1  | 1-Butanone, 2-chloro-3-methyl-1-phenyl-                                               | 0.017                 | 0.041         | 0.005 | 0.000                  | 0.130                  | 0.000          | 0.000       | 0.000                   | 0.471             |
| 527-53-7    | Benzene, 1,2,3,5-tetramethyl-                                                         | 0.000                 | 0.005         | 0.006 | 0.000                  | 0.013                  | 0.000          | 0.000       | 0.000                   | 0.633             |
| None        | Benzamide, N-(3-methylthio-1,2,4-thiadiazol-5-yl)-                                    | 0.000                 | 0.041         | 0.000 | 0.000                  | 0.082                  | 0.000          | 0.000       | 0.052                   | 0.471             |
| 99-87-6     | p-Cymene                                                                              | 0.007                 | 0.000         | 0.018 | 0.000                  | 0.008                  | 0.000          | 0.000       | 0.000                   | 0.570             |
| 59212-75-8  | 2,2'-Isopropylidenebis(5-methylfuran)                                                 | 0.000                 | 0.000         | 0.094 | 0.134                  | 0.233                  | 0.000          | 0.000       | 0.140                   | 0.000             |
| 92-52-4     | Biphenyl                                                                              | 0.009                 | 0.007         | 0.007 | 0.010                  | 0.010                  | 0.014          | 0.003       | 0.004                   | 0.535             |
| 585-74-0    | Ethanone, 1-(3-methylphenyl)-                                                         | 0.000                 | 0.000         | 0.000 | 0.000                  | 0.000                  | 0.000          | 0.000       | 0.000                   | 0.585             |
| 693-54-9    | 2-Decanone                                                                            | 0.018                 | 0.066         | 0.081 | 0.000                  | 0.177                  | 0.000          | 0.044       | 0.000                   | 0.196             |
| 40710-70-1  | Octatetracontane, 1-iodo-                                                             | 0.000                 | 0.015         | 0.433 | 0.015                  | 0.045                  | 0.000          | 0.000       | 0.010                   | 0.054             |
| 52896-87-4  | Heptane, 4-(1-methylethyl)-                                                           | 0.018                 | 0.013         | 0.015 | 0.000                  | 0.000                  | 0.052          | 0.000       | 0.000                   | 0.453             |
| 1565-81-7   | 3-Decanol                                                                             | 0.041                 | 0.000         | 0.362 | 0.000                  | 0.000                  | 0.021          | 0.000       | 0.000                   | 0.099             |
| 112-39-0    | Hexadecanoic acid, methyl ester                                                       | 0.040                 | 0.033         | 0.041 | 0.060                  | 0.056                  | 0.005          | 0.033       | 0.042                   | 0.194             |

Table S1. Cont.

| CAS Number  | Chemical Name                                                                    | Grand Isle State Park |               |       |                        |                        | Grand Isle Beach |             |                         |                   |
|-------------|----------------------------------------------------------------------------------|-----------------------|---------------|-------|------------------------|------------------------|------------------|-------------|-------------------------|-------------------|
|             |                                                                                  | Inter-Tidal_1         | Inter-Tidal_2 | Dune  | Inter-Tidal_1 Targeted | Inter-Tidal_2 Targeted | Bottom of Dune   | Top of Dune | Bottom of Dune Targeted | Mix of 3 Tarballs |
| None        | 1-Adamantanecarboxylic acid, 2-tetrahydrofurylmethyl ester                       | 0.058                 | 0.013         | 0.167 | 0.013                  | 0.041                  | 0.002            | 0.008       | 0.015                   | 0.166             |
| 91-20-3     | Naphthalene                                                                      | 0.145                 | 0.055         | 0.039 | 0.034                  | 0.070                  | 0.016            | 0.112       | 0.011                   | 0.000             |
| 30221-21-7  | tert-Butyl isopropyl carbonate                                                   | 0.112                 | 0.000         | 0.122 | 0.100                  | 0.015                  | 0.000            | 0.031       | 0.000                   | 0.099             |
| 445-27-2    | o-Fluoroacetophenone                                                             | 0.000                 | 0.000         | 0.000 | 0.072                  | 0.368                  | 0.006            | 0.000       | 0.030                   | 0.000             |
| 137235-48-4 | 6S-2,3,8,8-Tetramethyltricyclo[5.2.2.0(1,6)]undec-2-ene                          | 0.006                 | 0.003         | 0.095 | 0.133                  | 0.233                  | 0.000            | 0.000       | 0.000                   | 0.000             |
| 4426-31-7   | Borinic acid, diethyl-                                                           | 0.039                 | 0.007         | 0.286 | 0.000                  | 0.130                  | 0.000            | 0.000       | 0.000                   | 0.000             |
| 33933-82-3  | 2-Decanone, 5,9-dimethyl-                                                        | 0.000                 | 0.000         | 0.000 | 0.204                  | 0.015                  | 0.067            | 0.055       | 0.112                   | 0.000             |
| None        | 1H-Pyrazolo[3,4-b]pyridin-3(2H)-one, 6-hydroxy-4-methyl-2-phenyl-                | 0.000                 | 0.012         | 0.000 | 0.000                  | 0.000                  | 0.000            | 0.000       | 0.000                   | 0.392             |
| 17699-05-7  | Bicyclo[3.1.1]hept-2-ene, 2,6-dimethyl-6-(4-methyl-3-pentenyl)-                  | 0.000                 | 0.000         | 0.115 | 0.042                  | 0.143                  | 0.000            | 0.000       | 0.087                   | 0.000             |
| 52-53-9     | Verapamil                                                                        | 0.000                 | 0.000         | 0.000 | 0.014                  | 0.032                  | 0.000            | 0.000       | 0.000                   | 0.337             |
| 121747-63-5 | 2,2,6,7-Tetramethyl-10-oxatricyclo[4.3.0.1(1,7)]decan-one                        | 0.058                 | 0.034         | 0.060 | 0.014                  | 0.029                  | 0.043            | 0.072       | 0.054                   | 0.000             |
| 34645-03-9  | 3,6-Dimethyl-4-octanone                                                          | 0.000                 | 0.000         | 0.000 | 0.000                  | 0.056                  | 0.000            | 0.014       | 0.000                   | 0.294             |
| 111-13-7    | 2-Octanone                                                                       | 0.000                 | 0.154         | 0.000 | 0.000                  | 0.182                  | 0.000            | 0.023       | 0.000                   | 0.000             |
| 620-14-4    | Benzene, 1-ethyl-3-methyl-                                                       | 0.000                 | 0.000         | 0.000 | 0.000                  | 0.018                  | 0.000            | 0.000       | 0.000                   | 0.338             |
| None        | 8H-Pyrano[2,3-e]benzothiophen-8-one, 4-formamido-6-methyl                        | 0.000                 | 0.000         | 0.000 | 0.000                  | 0.000                  | 0.000            | 0.000       | 0.000                   | 0.349             |
| 84609-99-4  | Pyrimidin-5-amine, 2-(4-butoxyphenyl)-                                           | 0.000                 | 0.000         | 0.000 | 0.000                  | 0.000                  | 0.000            | 0.000       | 0.000                   | 0.349             |
| 3910-35-8   | 1H-Indene, 2,3-dihydro-1,1,3-trimethyl-3-phenyl-                                 | 0.058                 | 0.026         | 0.051 | 0.024                  | 0.061                  | 0.068            | 0.053       | 0.009                   | 0.000             |
| 2371-42-8   | 2-Methylisoborneol                                                               | 0.015                 | 0.025         | 0.228 | 0.000                  | 0.066                  | 0.000            | 0.014       | 0.000                   | 0.000             |
| 98-82-8     | Isopropylbenzene                                                                 | 0.000                 | 0.040         | 0.000 | 0.000                  | 0.036                  | 0.000            | 0.000       | 0.000                   | 0.272             |
| 155249-75-5 | 3-Chloro-N,N-dimethyl-6-phenyl-11H-indolo[3,2-c]quinoline-11-ethanamine, 5-oxide | 0.007                 | 0.007         | 0.061 | 0.040                  | 0.026                  | 0.012            | 0.012       | 0.021                   | 0.145             |
| 85-01-8     | Phenanthrene                                                                     | 0.030                 | 0.018         | 0.013 | 0.014                  | 0.057                  | 0.007            | 0.005       | 0.009                   | 0.156             |
| 122-03-2    | Benzaldehyde, 4-(1-methylethyl)-                                                 | 0.019                 | 0.007         | 0.000 | 0.000                  | 0.009                  | 0.004            | 0.000       | 0.003                   | 0.260             |
| 10152-65-5  | Cyclopropanedodecanoic acid, 2-octyl-, methyl ester                              | 0.003                 | 0.007         | 0.000 | 0.000                  | 0.007                  | 0.004            | 0.000       | 0.003                   | 0.260             |
| 700-12-9    | Benzene, pentamethyl-                                                            | 0.000                 | 0.000         | 0.000 | 0.000                  | 0.105                  | 0.000            | 0.000       | 0.000                   | 0.178             |
| 63922-41-8  | 5-Hepten-3-yn-2-ol, 6-methyl-5-(1-methylethyl)-                                  | 0.075                 | 0.045         | 0.014 | 0.000                  | 0.000                  | 0.120            | 0.027       | 0.000                   | 0.000             |
| 3/7/3983    | Cyclohexene,1-(2-methylpropyl)-                                                  | 0.000                 | 0.000         | 0.000 | 0.000                  | 0.000                  | 0.000            | 0.000       | 0.000                   | 0.281             |
| 2471-83-2   | 1H-Indene, 1-ethylidene-                                                         | 0.000                 | 0.000         | 0.000 | 0.007                  | 0.014                  | 0.000            | 0.000       | 0.000                   | 0.230             |
| None        | Sulfurous acid, octyl 2-pentyl ester                                             | 0.094                 | 0.005         | 0.120 | 0.000                  | 0.000                  | 0.011            | 0.013       | 0.007                   | 0.000             |
| 29812-79-1  | Hydroxylamine, O-decyl-                                                          | 0.012                 | 0.014         | 0.000 | 0.000                  | 0.201                  | 0.000            | 0.023       | 0.000                   | 0.000             |
| 84534-30-5  | 3-Heptadecanol                                                                   | 0.009                 | 0.029         | 0.030 | 0.000                  | 0.000                  | 0.004            | 0.176       | 0.000                   | 0.000             |
| 82756-19-2  | Benzo[b][1,8]-naphthyridin-5(10H)-one, 2,4,7-trimethyl-                          | 0.000                 | 0.000         | 0.000 | 0.000                  | 0.000                  | 0.000            | 0.000       | 0.000                   | 0.240             |
| 29211-68-5  | 3-tert-Butyl-2-pyrazolin-5-one                                                   | 0.021                 | 0.044         | 0.029 | 0.000                  | 0.022                  | 0.031            | 0.014       | 0.079                   | 0.000             |



Table S1. Cont.

| CAS Number | Chemical Name                                                          | Grand Isle State Park |               |             |                        |                        | Grand Isle Beach |             |                         |                   |
|------------|------------------------------------------------------------------------|-----------------------|---------------|-------------|------------------------|------------------------|------------------|-------------|-------------------------|-------------------|
|            |                                                                        | Inter-Tidal_1         | Inter-Tidal_2 | Dune        | Inter-Tidal_1 Targeted | Inter-Tidal_2 Targeted | Bottom of Dune   | Top of Dune | Bottom of Dune Targeted | Mix of 3 Tarballs |
| 122-03-2   | Benzaldehyde, 4-(1-methylethyl)-                                       | 0.015                 | 0.007         | 0.000       | 0.000                  | 0.007                  | 0.000            | 0.000       | 0.000                   | 0.041             |
| 20185-55-1 | Benzoic acid, 4-(1-methylethyl)-, methyl ester                         | 0.000                 | 0.000         | 0.015       | 0.000                  | 0.000                  | 0.000            | 0.000       | 0.000                   | 0.049             |
| 61141-65-9 | Benzocyclododecene,<br>2,3-diethyl-4a,5,6,7,8,9,10,11,12,13-decahydro- | 0.010                 | 0.000         | 0.007       | 0.000                  | 0.000                  | 0.015            | 0.013       | 0.014                   | 0.000             |
| 2700-84-7  | 2,2-Dimethyl-1-(2,4,6-trimethylphenyl)propan-1-one                     | 0.000                 | 0.000         | 0.000       | 0.000                  | 0.022                  | 0.000            | 0.000       | 0.033                   | 0.000             |
| 13956-29-1 | Cannabidiol                                                            | 0.004                 | 0.000         | 0.005       | 0.000                  | 0.000                  | 0.024            | 0.022       | 0.000                   | 0.000             |
| 18835-33-1 | 1-Hexacosene                                                           | 0.000                 | 0.000         | 0.000       | 0.000                  | 0.019                  | 0.031            | 0.000       | 0.000                   | 0.000             |
| None       | 15-Hydroxy-7-oxodehydroabietic acid, methyl ester                      | 0.000                 | 0.000         | 0.000       | 0.000                  | 0.000                  | 0.000            | 0.000       | 0.000                   | 0.049             |
| 127-43-5   | 1-Penten-3-one, 1-(2,6,6-trimethyl-1-cyclohexen-1-yl)-                 | 0.000                 | 0.000         | 0.000       | 0.000                  | 0.000                  | 0.000            | 0.000       | 0.000                   | 0.046             |
| 106-46-7   | Benzene, 1,4-dichloro-                                                 | 0.019                 | 0.004         | 0.000       | 0.000                  | 0.000                  | 0.008            | 0.013       | 0.000                   | 0.000             |
| 829-26-5   | Naphthalene, 2,3,6-trimethyl-                                          | 0.000                 | 0.000         | 0.000       | 0.000                  | 0.000                  | 0.000            | 0.000       | 0.000                   | 0.043             |
| 29577-19-3 | m-Cymene, 5-tert-butyl-                                                | 0.000                 | 0.000         | 0.000       | 0.000                  | 0.000                  | 0.000            | 0.000       | 0.000                   | 0.036             |
| 6909-22-4  | 5-Caranol, trans,trans-(+)-                                            | 0.000                 | 0.000         | 0.000       | 0.000                  | 0.029                  | 0.000            | 0.000       | 0.000                   | 0.000             |
| None       | Androst-5-en-3-ol-17-one, 16,16-trimethylenedithio-                    | 0.005                 | 0.000         | 0.000       | 0.000                  | 0.000                  | 0.005            | 0.018       | 0.000                   | 0.000             |
| None       | 1-Benzenesulfonylhydrazide,<br>N'-tricyclo[4.2.2.0(1,5)dec-8-ylidene]  | 0.000                 | 0.000         | 0.000       | 0.007                  | 0.000                  | 0.000            | 0.000       | 0.000                   | 0.000             |
| 925-78-0   | 3-Nonanone                                                             | 0.000                 | 0.005         | 0.000       | 0.000                  | 0.000                  | 0.000            | 0.000       | 0.000                   | 0.000             |
| 21898-95-3 | Tricyclo[4.3.1.1(3,8)]undecane, 1-methoxy-                             | 0.005                 | 0.000         | 0.000       | 0.000                  | 0.000                  | 0.000            | 0.000       | 0.000                   | 0.000             |
| 29812-79-1 | Hydroxylamine, O-decyl-                                                | 0.000                 | 0.000         | 0.000       | 0.000                  | 0.000                  | 0.000            | 0.000       | 0.000                   | 0.000             |
| 544-76-3   | Hexadecane                                                             | 0.000                 | 0.000         | 0.000       | 0.000                  | 0.000                  | 0.000            | 0.000       | 0.000                   | 0.000             |
| None       | 9-Methylene-1-phenyl-3,6-diazahomoadaman                               | 0.000                 | 0.000         | 0.000       | 0.000                  | 0.000                  | 0.000            | 0.000       | 0.000                   | 0.000             |
|            | <b>Sum (ng/g)</b>                                                      | <b>25.1</b>           | <b>10.9</b>   | <b>17.3</b> | <b>4.8</b>             | <b>20.0</b>            | <b>6.0</b>       | <b>7.4</b>  | <b>7.1</b>              | <b>68.6</b>       |

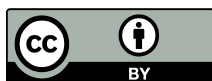

Supplement: ijerph-13-00853-s001.pdf [file ijerph-13-00853-s001.pdf]
